# Supplementary material for: Population attributable risk estimates of risk factors for contrast-induced acute kidney injury following coronary angiography: a cohort study
Source: Springer Nature journal article supplement (doi:10.1186/s12872-020-01570-6), 2020-06-12
Supplement: MOESM2 [file 18078196]

Figure S1. Landmark analysis discriminating between all-cause mortality before and after 90-days of follow-up

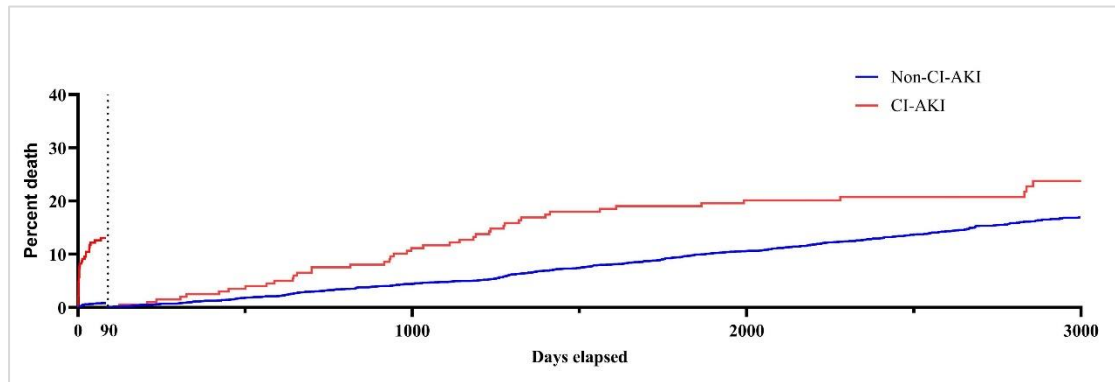

Before 90-days: log-rank  $P < 0.01$ ; After 90-days: log-rank  $P < 0.01$
